# Supplementary material for: Genomic basis of schistosome resistance in a molluscan vector of human schistosomiasis
Source: PubMed Central journal article supplement (PMC11699755; doi:10.1016/j.isci.2024.111520), 2024-12-02
Supplement: mmc1.pdf [file mmc1.pdf]

**iScience, Volume 28**

**Supplemental information**

**Genomic basis of schistosome resistance  
in a molluscan vector of human schistosomiasis**

**Si-Ming Zhang, Guiyun Yan, Abdelmalek Lekired, and Daibin Zhong**

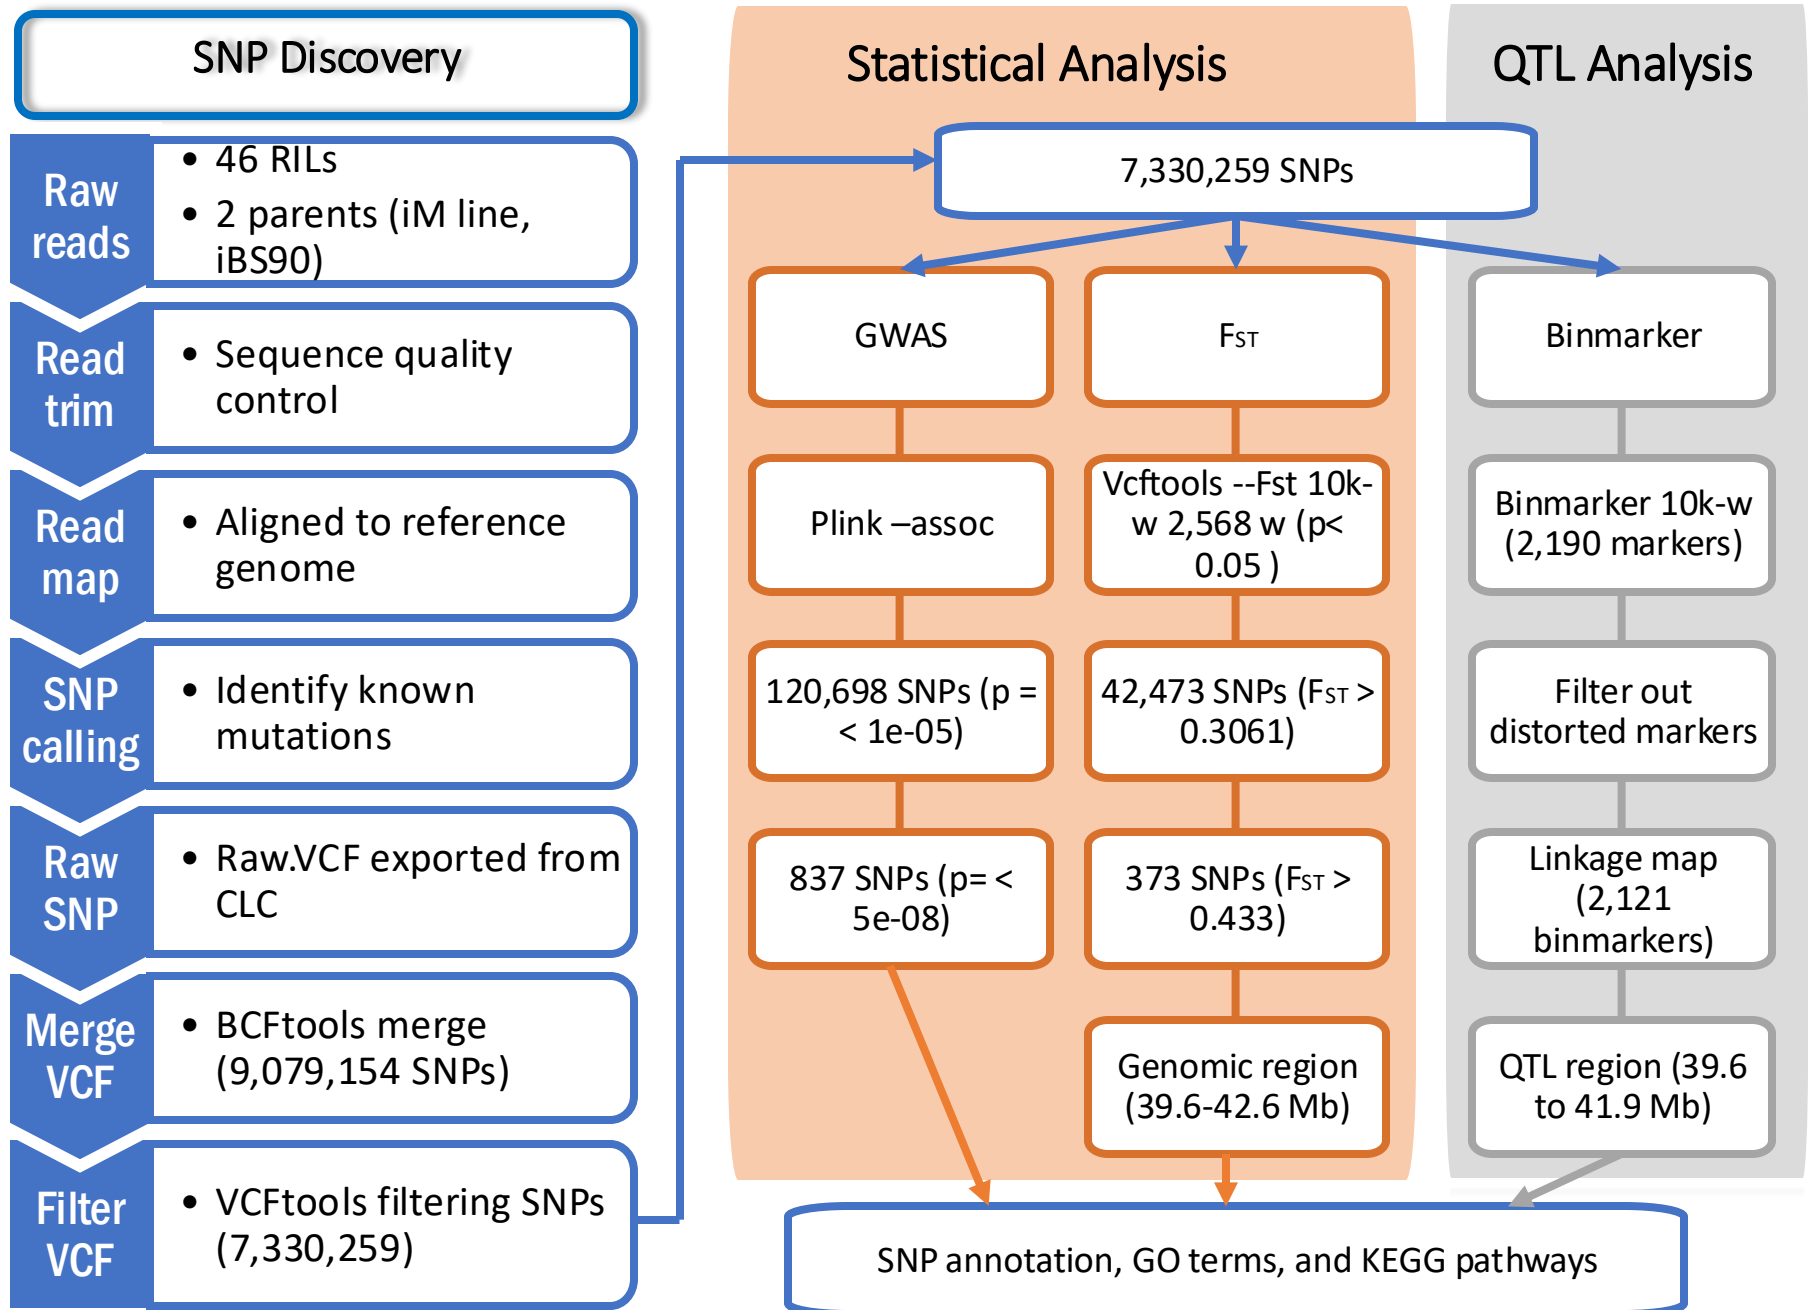

**Figure S1. A flowchart of bioinformatic and genetic analyses**
